# Supplementary material for: Single cell analysis reveals immune cell–adipocyte crosstalk regulating the transcription of thermogenic adipocytes
Source: eLife journal article supplement (doi:10.7554/elife.49501), 2019-10-23

**A**

*mitochondrial electron transport,  
cytochrome c to oxygen (GO:0006123)*

aerobic electron transport chain  
(GO:0019646)

oxidative phosphorylation (GO:0006119)

*respiratory electron transport chain  
(GO:0022904)*

electron transport chain (GO:0022900)

*cellular response to calcium ion  
(GO:0071277)*

positive regulation of mRNA metabolic  
process (GO:1903313)

cellular respiration (GO:0045333)

*positive regulation of cold-induced  
thermogenesis (GO:0120162)*

energy derivation by oxidation of organic  
compounds (GO:0015980)

Log2FC(N/P)

0 Fold Enrichment >10

**B**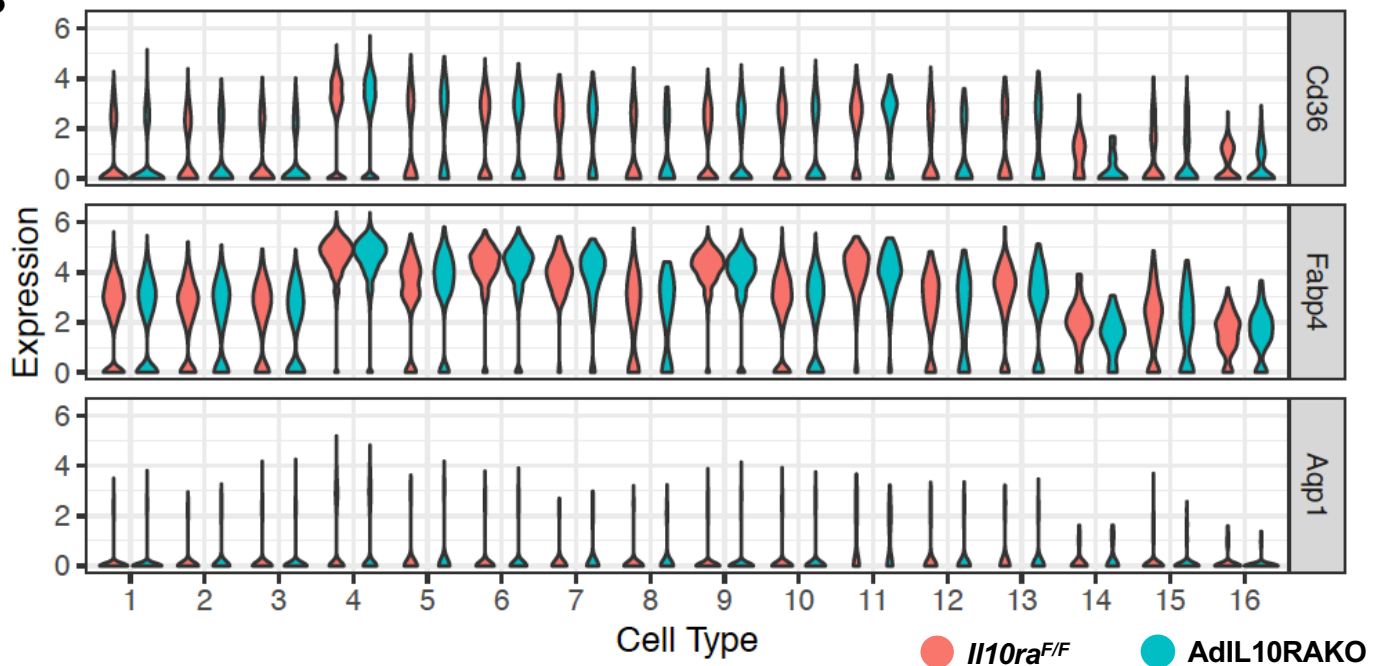

Supplement: supp [file elife-49501-supp-v1.zip]
