# Supplementary figures and images for: Single cell analysis reveals immune cell–adipocyte crosstalk regulating the transcription of thermogenic adipocytes
Source: eLife journal article supplement (doi:10.7554/elife.49501), 2019-10-23

A

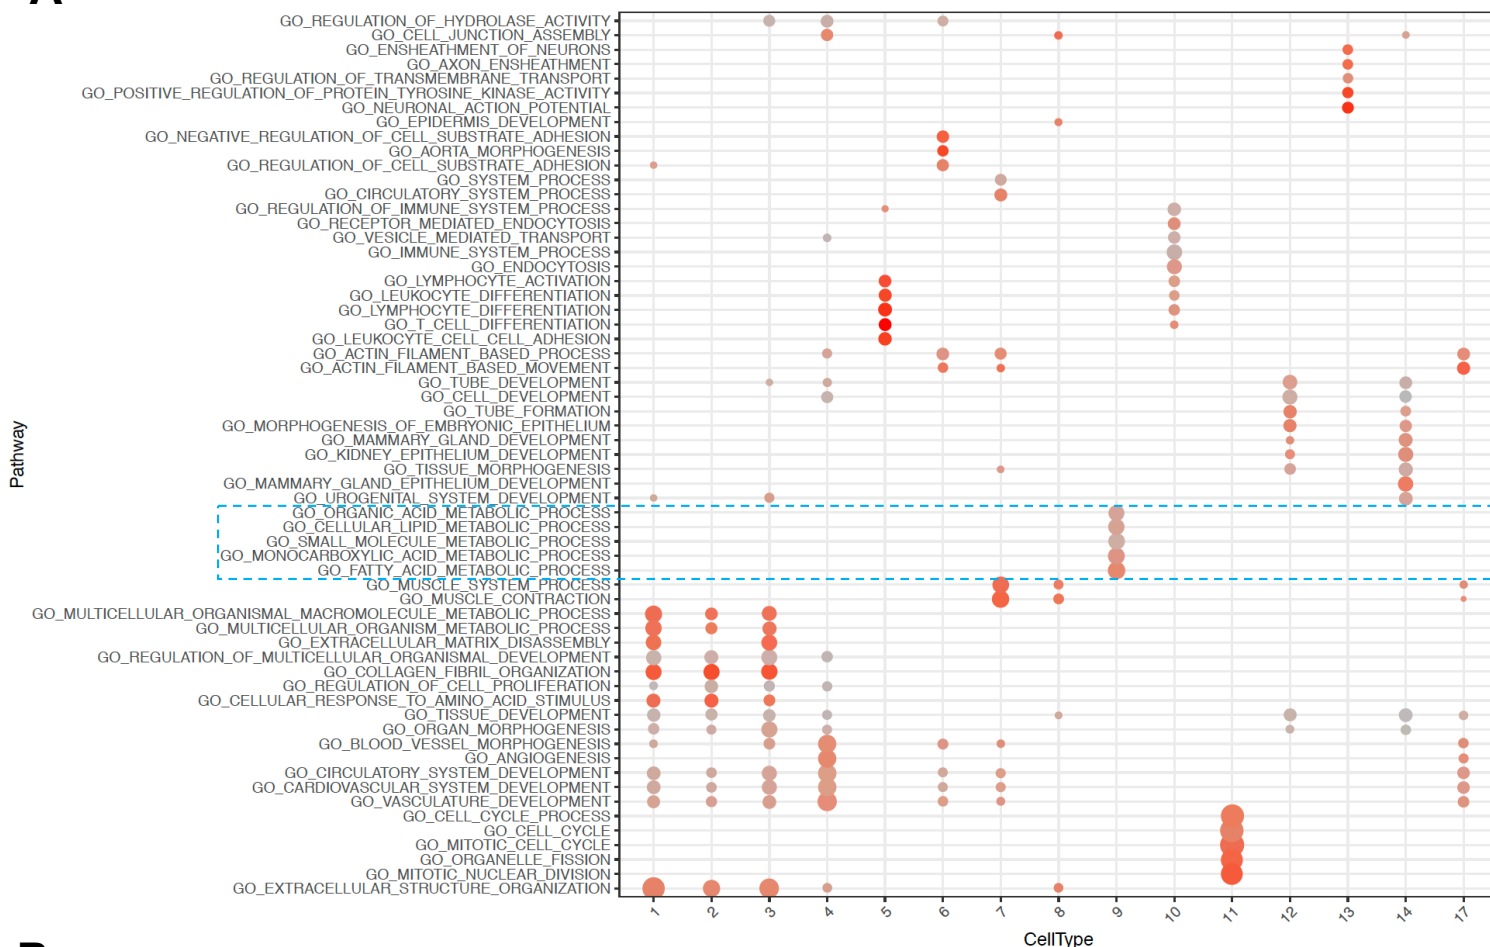

B

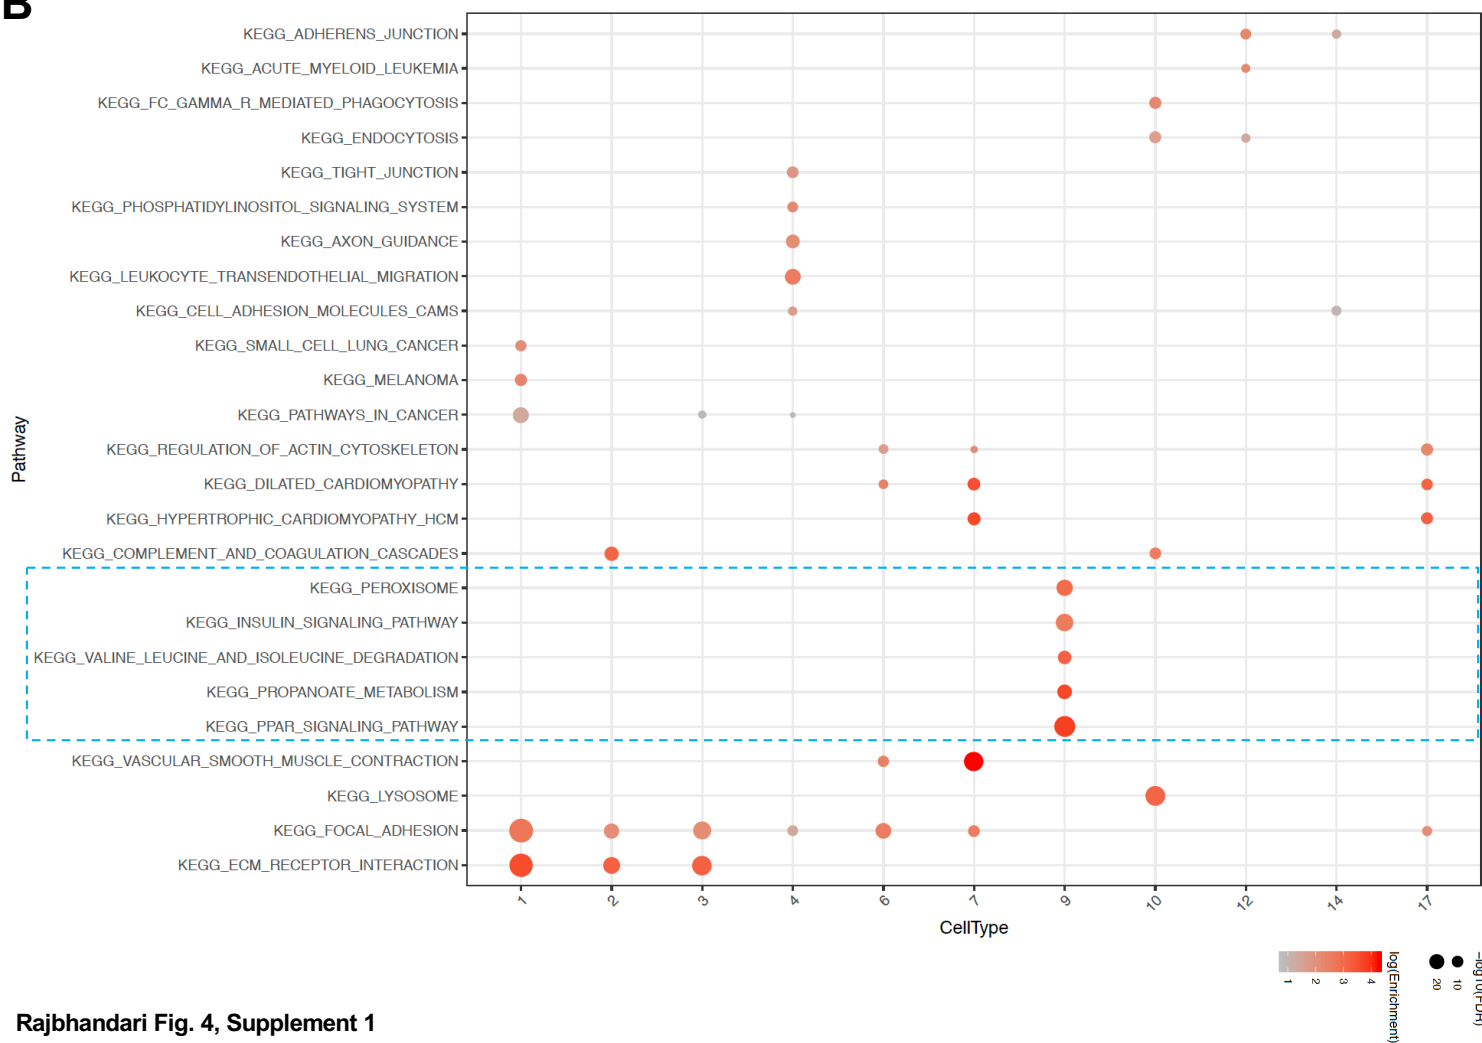

Supplement: supp [file elife-49501-supp-v1.zip]

**A****10 weeks chow diet**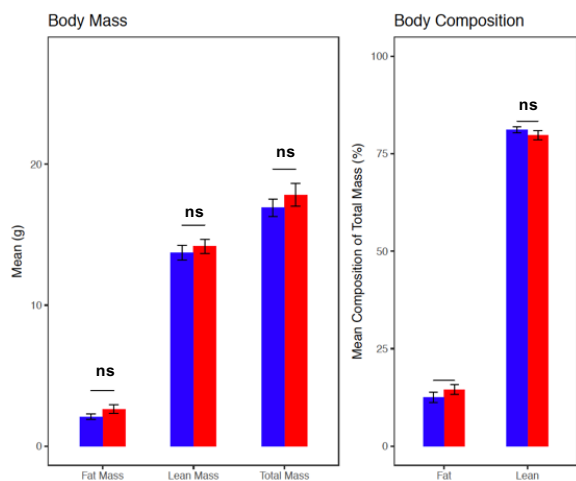**B**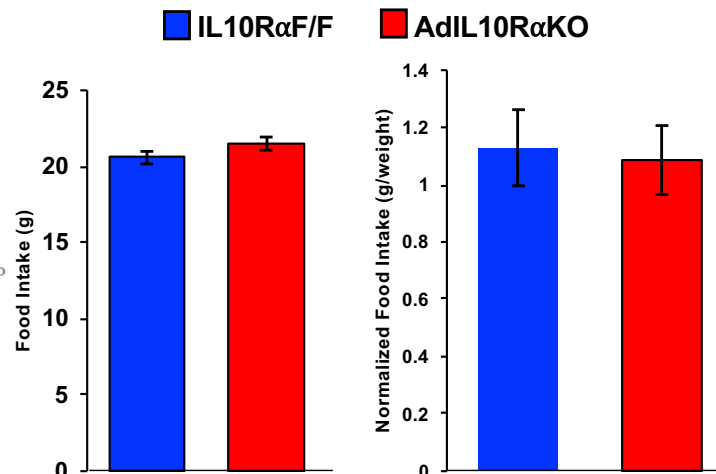**C**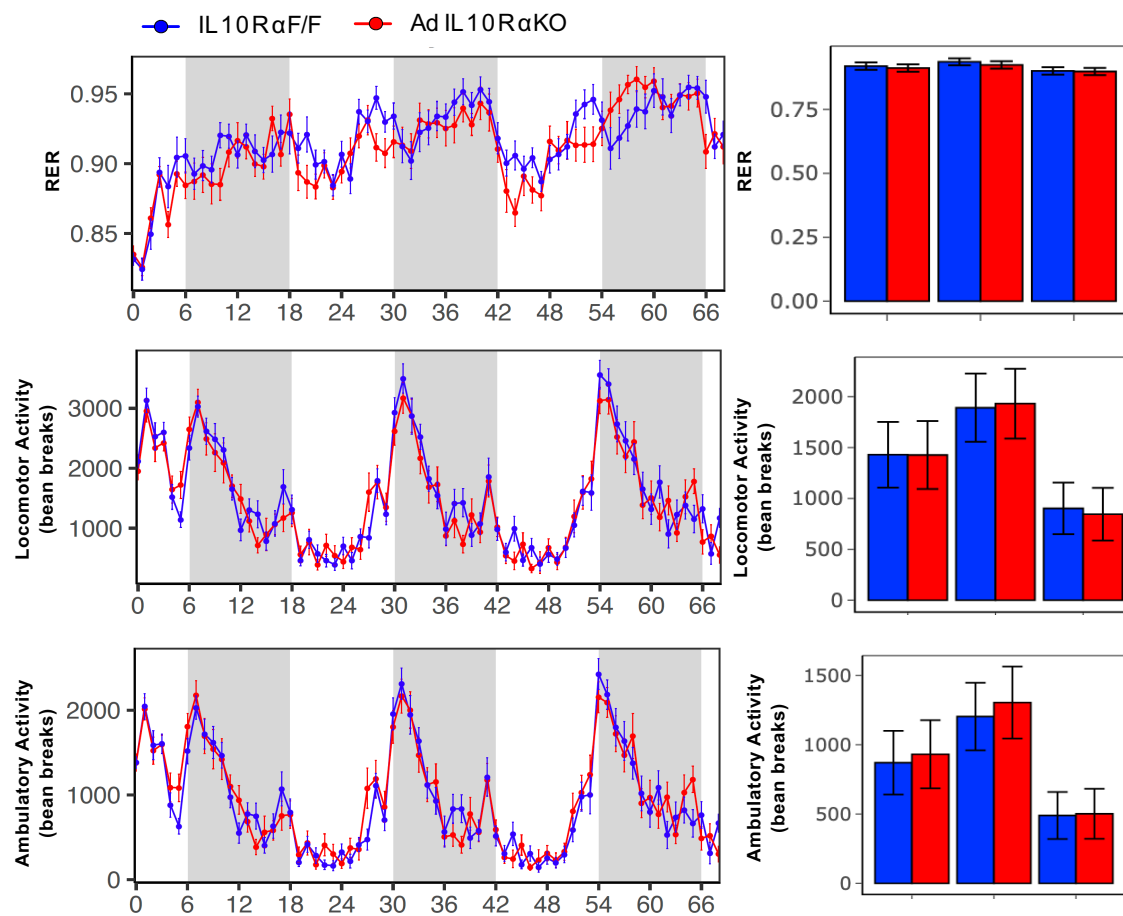**D**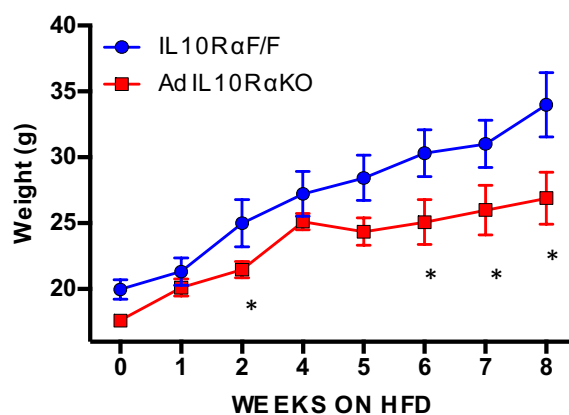

Supplement: supp [file elife-49501-supp-v1.zip]

**A****cluster 1**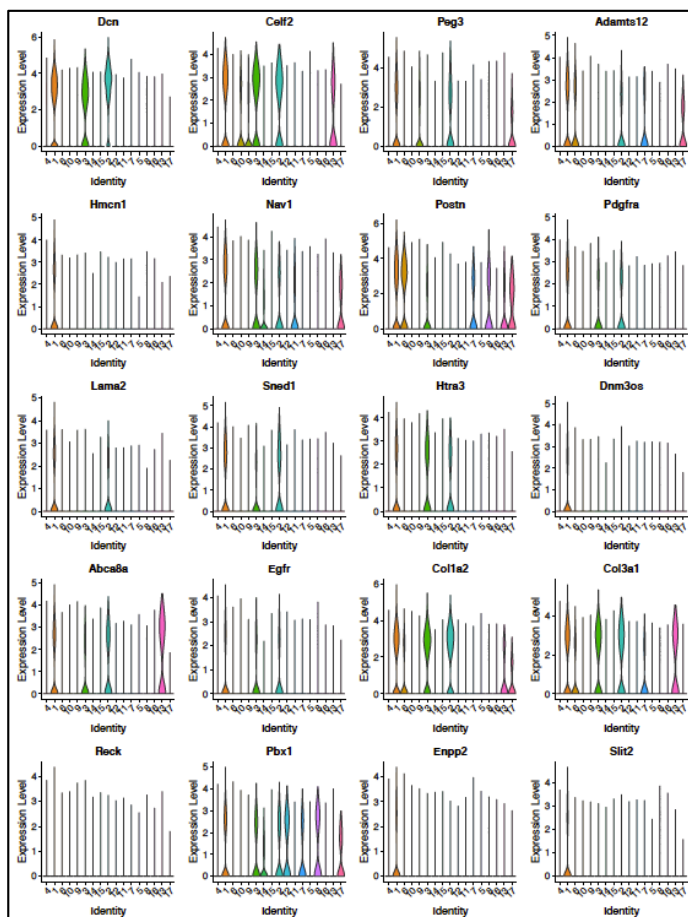**cluster 4**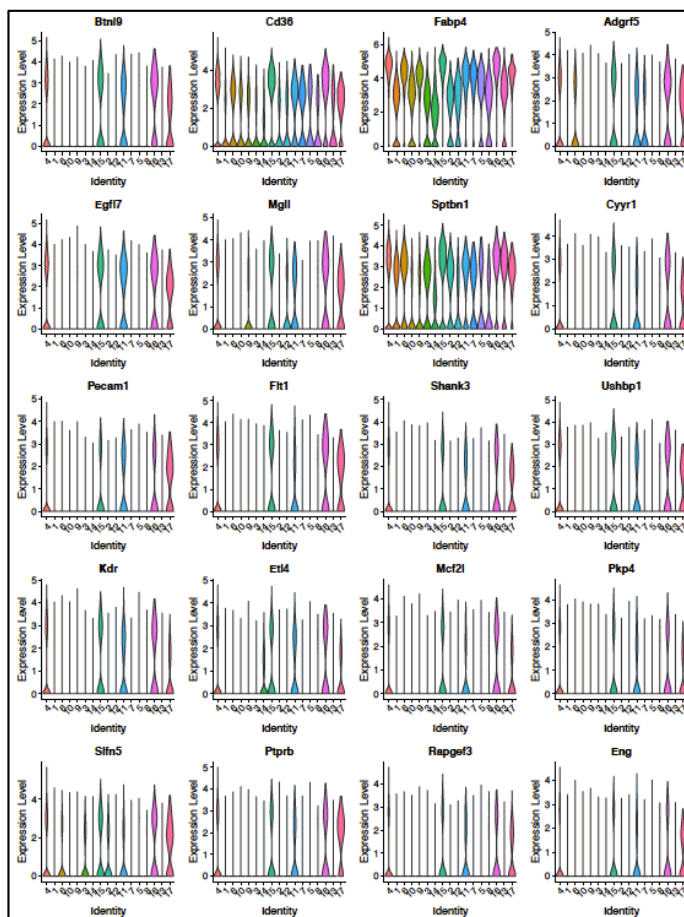**cluster 9**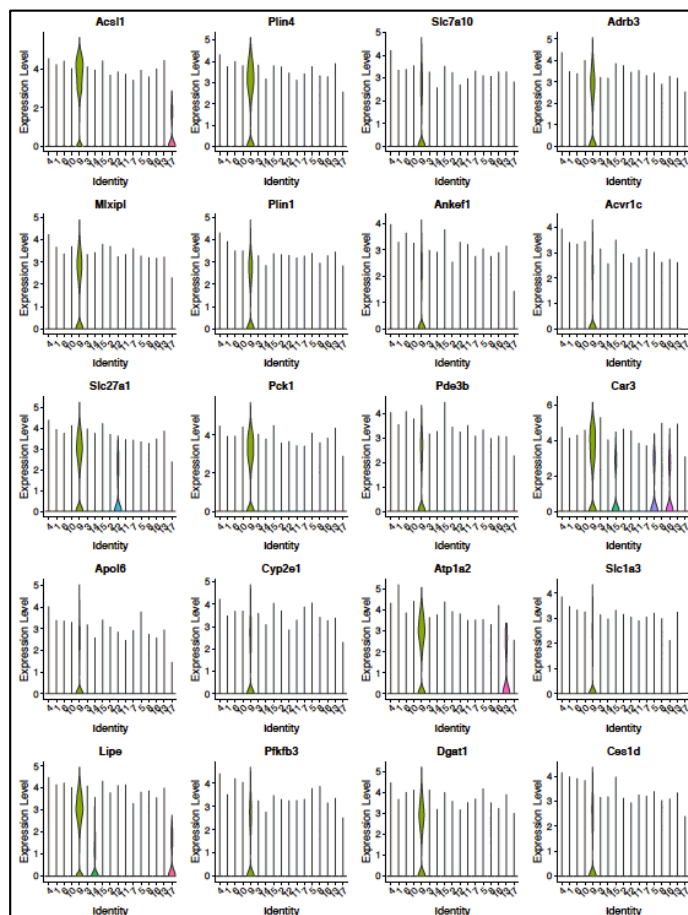**B**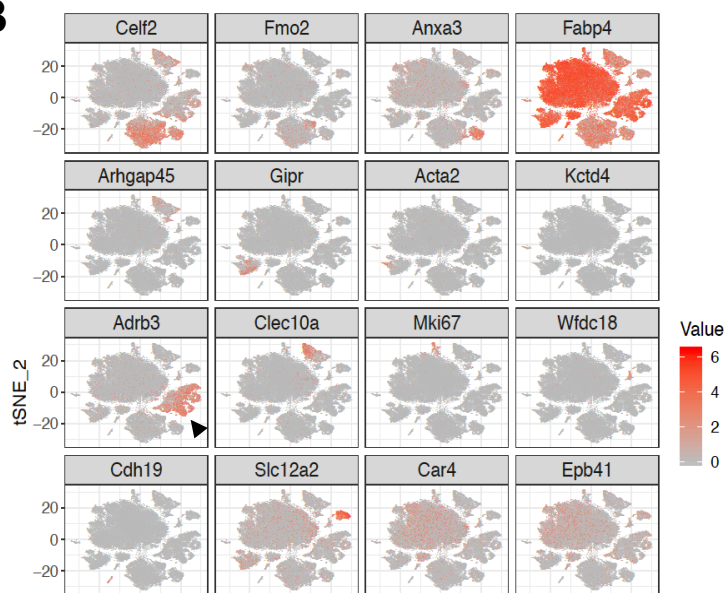**C**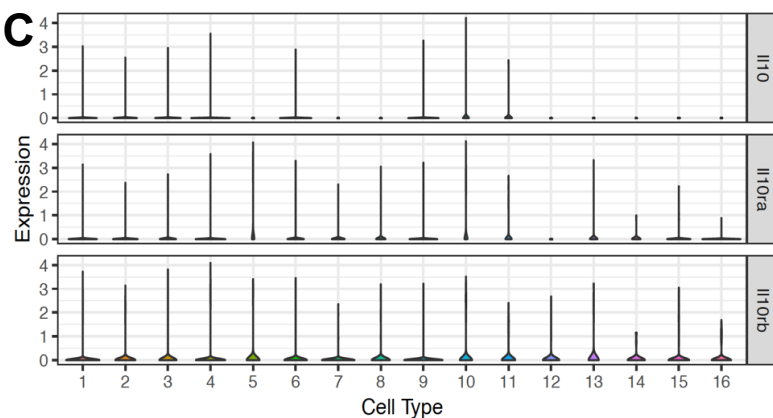

Supplement: supp [file elife-49501-supp-v1.zip]

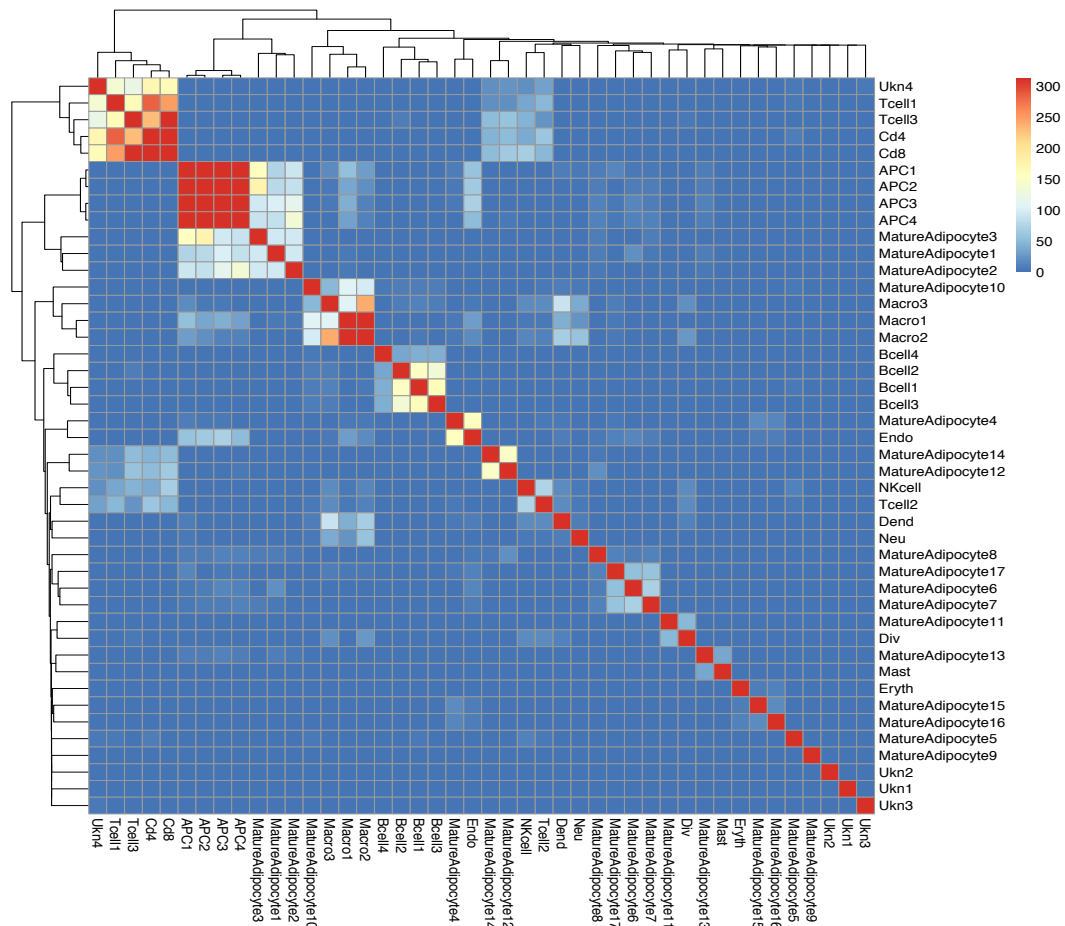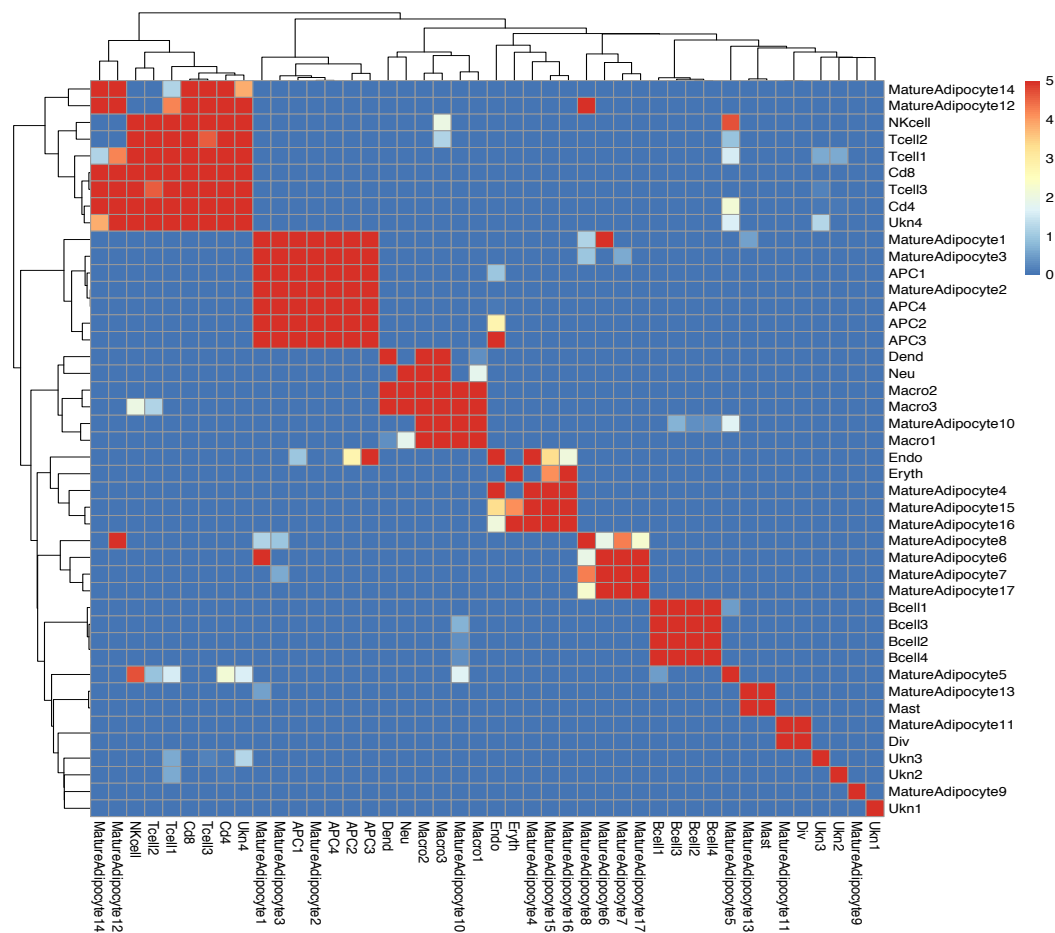

Supplement: supp [file elife-49501-supp-v1.zip]
